# Supplementary material for: Slow dynamics, hydration and heterogeneity in Laponite dispersions
Source: Royal Society of Chemistry journal article supplement (doi:10.1039/c2sm27474d), 2013-01-01
Supplement: c2sm27474d.pdf [file c2sm27474d.pdf]

## Supporting Information

### Slow Dynamics, Hydration and Heterogeneity in Laponite Dispersions

Ravi Kumar Pujala and H. B. Bohidar\*

Nanomaterials and Nanocomposite Laboratory

School of Physical Sciences, Jawaharlal Nehru University

New Delhi-110067, India

\*Corresponding author email: [bohi0700@mail.jnu.ac.in](mailto:bohi0700@mail.jnu.ac.in)

Tel: +91 11 2670 4637, Fax: + 91 11 2674 1837

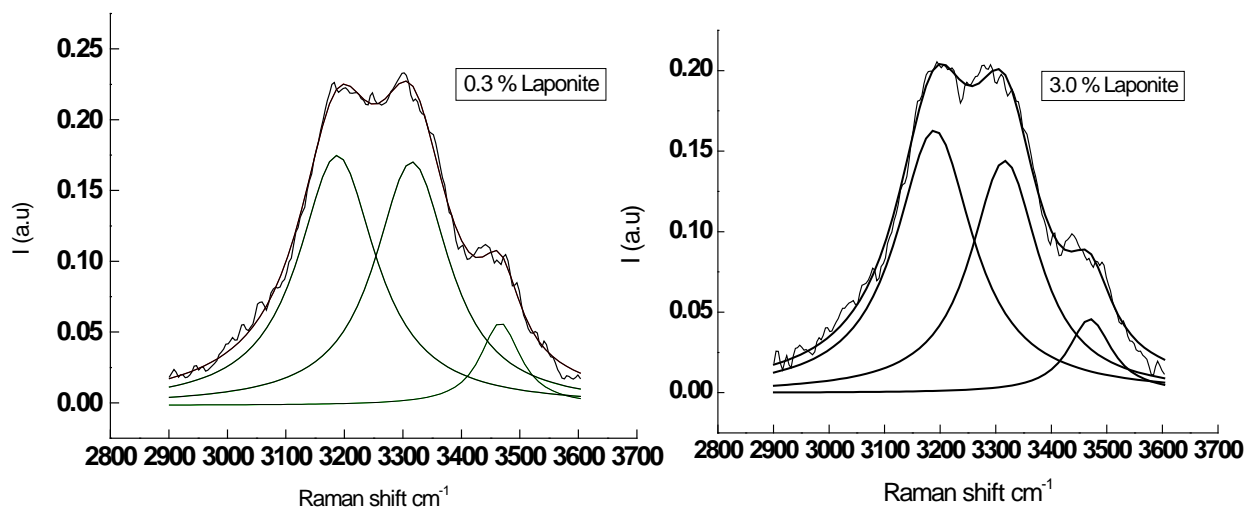

**Figure S1.** Representative deconvolution of raw Raman spectra of 0.3% and 3.0% (w/v) Laponite dispersions. The best result was observed for three component Lorentzian fitting where  $\chi^2 > 0.99$  for all the cases.

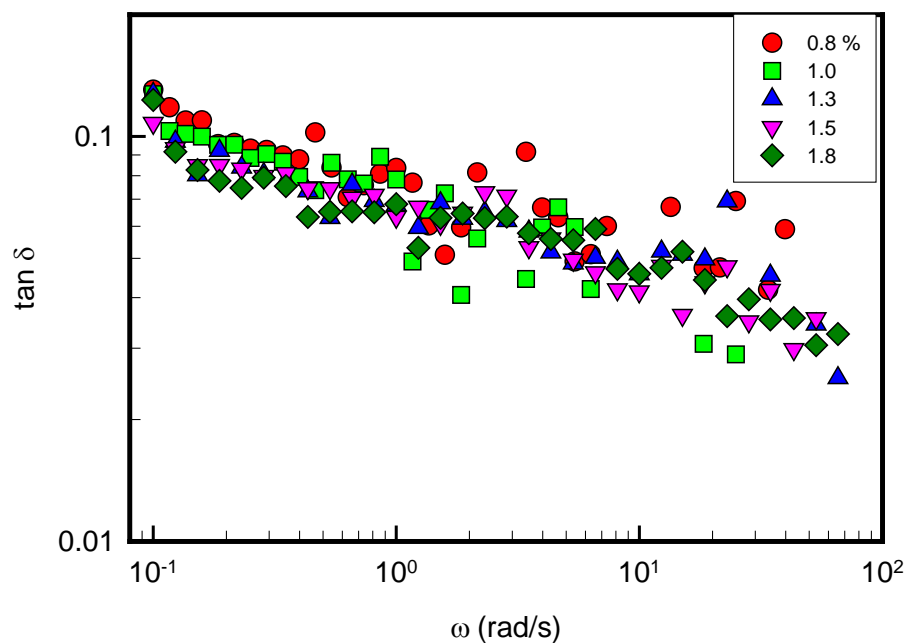

**Figure S2.** The loss tangent of Laponite dispersions at different concentrations below 2% (w/v).
